# Supplementary material
Source: MDPI journal article supplement (https://www.mdpi.com/2304-6740/4/2/19)

# checkCIF/PLATON report

You have not supplied any structure factors. As a result the full set of tests cannot be run.

THIS REPORT IS FOR GUIDANCE ONLY. IF USED AS PART OF A REVIEW PROCEDURE FOR PUBLICATION, IT SHOULD NOT REPLACE THE EXPERTISE OF AN EXPERIENCED CRYSTALLOGRAPHIC REFEREE.

No syntax errors found.      CIF dictionary      Interpreting this report

## Datablock: x1950

---

Bond precision:    C-C = 0.0134 A

Wavelength=0.71073

Cell:                a=16.2901(9)                b=17.2775(8)                c=19.5167(8)  
                      alpha=103.329(4)        beta=101.969(4)        gamma=118.018(5)  
Temperature:    180 K

|                | Calculated            | Reported              |
|----------------|-----------------------|-----------------------|
| Volume         | 4388.4(5)             | 4388.4(4)             |
| Space group    | P -1                  | P-1                   |
| Hall group     | -P 1                  | ?                     |
| Moiety formula | C81 H108 Li N9 O9 Sn4 | C81 H108 Li N9 O9 Sn4 |
| Sum formula    | C81 H108 Li N9 O9 Sn4 | C81 H108 Li N9 O9 Sn4 |
| Mr             | 1833.55               | 1833.46               |
| Dx,g cm-3      | 1.388                 | 1.388                 |
| Z              | 2                     | 2                     |
| Mu (mm-1)      | 1.181                 | 1.181                 |
| F000           | 1864.0                | 1864.0                |
| F000'          | 1859.36               |                       |
| h,k,lmax       | 19,20,23              | 19,20,23              |
| Nref           | 16076                 | 16052                 |
| Tmin,Tmax      | 0.844,0.977           | 0.937,1.000           |
| Tmin'          | 0.661                 |                       |

Correction method= # Reported T Limits: Tmin=0.937 Tmax=1.000  
AbsCorr = MULTI-SCAN

Data completeness= 0.999

Theta(max)= 25.350

R(reflections)= 0.0574( 10131)

wR2(reflections)= 0.1172( 16052)

S = 1.012

Npar= 954

---

The following ALERTS were generated. Each ALERT has the format

**test-name\_ALERT\_alert-type\_alert-level.**

Click on the hyperlinks for more details of the test.

---

**Alert level C**

|                   |                                                |                             |       |        |
|-------------------|------------------------------------------------|-----------------------------|-------|--------|
| PLAT213_ALERT_2_C | Atom C45                                       | has ADP max/min Ratio ..... | 3.3   | oblate |
| PLAT220_ALERT_2_C | Large Non-Solvent C                            | Ueq(max)/Ueq(min) Range     | 4.1   | Ratio  |
| PLAT234_ALERT_4_C | Large Hirshfeld Difference 06                  | -- C51 ..                   | 0.16  | Ang.   |
| PLAT234_ALERT_4_C | Large Hirshfeld Difference 09                  | -- C78 ..                   | 0.16  | Ang.   |
| PLAT234_ALERT_4_C | Large Hirshfeld Difference C51                 | -- C53 ..                   | 0.16  | Ang.   |
| PLAT234_ALERT_4_C | Large Hirshfeld Difference C51                 | -- C54 ..                   | 0.18  | Ang.   |
| PLAT241_ALERT_2_C | High 'MainMol' Ueq as Compared to Neighbors of | C4                          | Check |        |
| PLAT241_ALERT_2_C | High 'MainMol' Ueq as Compared to Neighbors of | Li1                         | Check |        |
| PLAT242_ALERT_2_C | Low 'MainMol' Ueq as Compared to Neighbors of  | C15                         | Check |        |
| PLAT242_ALERT_2_C | Low 'MainMol' Ueq as Compared to Neighbors of  | C42                         | Check |        |
| PLAT342_ALERT_3_C | Low Bond Precision on C-C Bonds .....          | 0.01335                     | Ang.  |        |
| PLAT413_ALERT_2_C | Short Inter XH3 .. XHn                         | H81B .. H26E ..             | 2.11  | Ang.   |

---

**Alert level G**

|                   |                                                  |        |        |  |
|-------------------|--------------------------------------------------|--------|--------|--|
| PLAT002_ALERT_2_G | Number of Distance or Angle Restraints on AtSite | 19     | Note   |  |
| PLAT003_ALERT_2_G | Number of Uiso or Uij Restrained non-H Atoms ... | 25     | Report |  |
| PLAT005_ALERT_5_G | No Embedded Refinement Details found in the CIF  | Please | Do !   |  |
| PLAT301_ALERT_3_G | Main Residue Disorder .....                      | 8      | Note   |  |
| PLAT720_ALERT_4_G | Number of Unusual/Non-Standard Labels .....      | 9      | Note   |  |
| PLAT779_ALERT_4_G | Suspect or Irrelevant (Bond) Angle in CIF .... # | 381    | Check  |  |
|                   | C6F -O1 -C6 1.555 1.555 1.555                    | 13.00  | Deg.   |  |
| PLAT779_ALERT_4_G | Suspect or Irrelevant (Bond) Angle in CIF .... # | 385    | Check  |  |
|                   | C24 -O3 -C24F 1.555 1.555 1.555                  | 5.80   | Deg.   |  |
| PLAT860_ALERT_3_G | Number of Least-Squares Restraints .....         | 91     | Note   |  |

---

- 0 **ALERT level A** = Most likely a serious problem - resolve or explain  
0 **ALERT level B** = A potentially serious problem, consider carefully  
12 **ALERT level C** = Check. Ensure it is not caused by an omission or oversight  
8 **ALERT level G** = General information/check it is not something unexpected

- 0 ALERT type 1 CIF construction/syntax error, inconsistent or missing data  
9 ALERT type 2 Indicator that the structure model may be wrong or deficient  
3 ALERT type 3 Indicator that the structure quality may be low  
7 ALERT type 4 Improvement, methodology, query or suggestion  
1 ALERT type 5 Informative message, check
- 
-

It is advisable to attempt to resolve as many as possible of the alerts in all categories. Often the minor alerts point to easily fixed oversights, errors and omissions in your CIF or refinement strategy, so attention to these fine details can be worthwhile. In order to resolve some of the more serious problems it may be necessary to carry out additional measurements or structure refinements. However, the purpose of your study may justify the reported deviations and the more serious of these should normally be commented upon in the discussion or experimental section of a paper or in the "special\_details" fields of the CIF. checkCIF was carefully designed to identify outliers and unusual parameters, but every test has its limitations and alerts that are not important in a particular case may appear. Conversely, the absence of alerts does not guarantee there are no aspects of the results needing attention. It is up to the individual to critically assess their own results and, if necessary, seek expert advice.

### **Publication of your CIF in IUCr journals**

A basic structural check has been run on your CIF. These basic checks will be run on all CIFs submitted for publication in IUCr journals (*Acta Crystallographica*, *Journal of Applied Crystallography*, *Journal of Synchrotron Radiation*); however, if you intend to submit to *Acta Crystallographica Section C* or *E* or *IUCrData*, you should make sure that full publication checks are run on the final version of your CIF prior to submission.

### **Publication of your CIF in other journals**

Please refer to the *Notes for Authors* of the relevant journal for any special instructions relating to CIF submission.

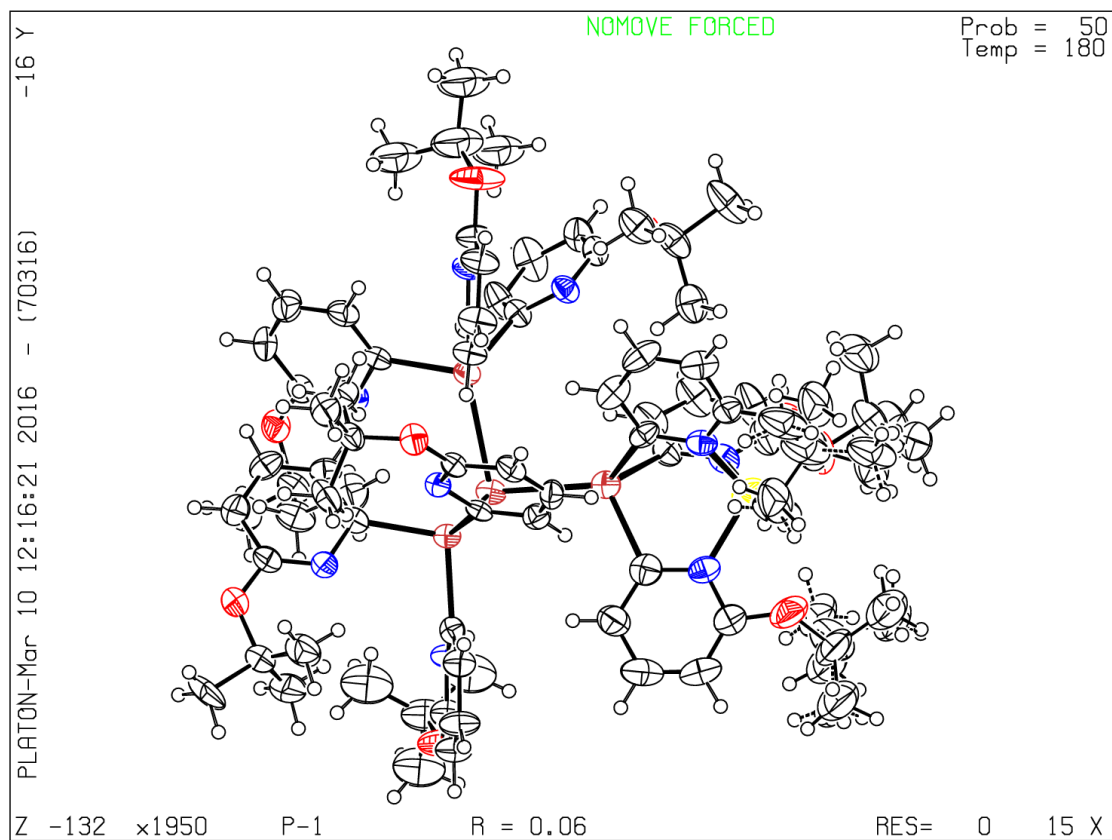

# checkCIF/PLATON report

You have not supplied any structure factors. As a result the full set of tests cannot be run.

THIS REPORT IS FOR GUIDANCE ONLY. IF USED AS PART OF A REVIEW PROCEDURE FOR PUBLICATION, IT SHOULD NOT REPLACE THE EXPERTISE OF AN EXPERIENCED CRYSTALLOGRAPHIC REFEREE.

No syntax errors found.      CIF dictionary      Interpreting this report

## Datablock: x1964

---

Bond precision:    C-C = 0.0099 A

Wavelength=0.71073

Cell:                a=17.2766(4)                b=19.4489(6)                c=28.6285(7)  
                      alpha=88.874(2)        beta=85.776(2)        gamma=65.256(3)  
Temperature:        130 K

|                | Calculated               | Reported                 |
|----------------|--------------------------|--------------------------|
| Volume         | 8711.9(5)                | 8711.9(4)                |
| Space group    | P -1                     | P-1                      |
| Hall group     | -P 1                     | ?                        |
| Moiety formula | C81 H108 Li N9 O9 Pb Sn3 | C81 H108 Li N9 O9 Pb Sn3 |
| Sum formula    | C81 H108 Li N9 O9 Pb Sn3 | C81 H108 Li N9 O9 Pb Sn3 |
| Mr             | 1922.04                  | 1921.96                  |
| Dx,g cm-3      | 1.465                    | 1.465                    |
| Z              | 4                        | 4                        |
| Mu (mm-1)      | 2.833                    | 2.833                    |
| F000           | 3856.0                   | 3856.0                   |
| F000'          | 3835.94                  |                          |
| h,k,lmax       | 22,25,37                 | 22,25,37                 |
| Nref           | 41571                    | 41501                    |
| Tmin,Tmax      | 0.512,0.893              | 0.780,1.000              |
| Tmin'          | 0.319                    |                          |

Correction method= # Reported T Limits: Tmin=0.780 Tmax=1.000  
AbsCorr = MULTI-SCAN

Data completeness= 0.998

Theta(max)= 27.880

R(reflections)= 0.0531( 28567)

wR2(reflections)= 0.1050( 41501)

S = 1.080

Npar= 1922

---

The following ALERTS were generated. Each ALERT has the format

**test-name\_ALERT\_alert-type\_alert-level.**

Click on the hyperlinks for more details of the test.

---

### ● Alert level C

|                   |                                                 |                             |       |        |
|-------------------|-------------------------------------------------|-----------------------------|-------|--------|
| PLAT213_ALERT_2_C | Atom O8                                         | has ADP max/min Ratio ..... | 3.1   | prolat |
| PLAT220_ALERT_2_C | Large Non-Solvent C                             | Ueq(max)/Ueq(min) Range     | 4.4   | Ratio  |
| PLAT220_ALERT_2_C | Large Non-Solvent C                             | Ueq(max)/Ueq(min) Range     | 5.4   | Ratio  |
| PLAT222_ALERT_3_C | Large Non-Solvent H                             | Uiso(max)/Uiso(min) ...     | 4.6   | Ratio  |
| PLAT222_ALERT_3_C | Large Non-Solvent H                             | Uiso(max)/Uiso(min) ...     | 5.9   | Ratio  |
| PLAT234_ALERT_4_C | Large Hirshfeld Difference C69                  | -- C71 ..                   | 0.16  | Ang.   |
| PLAT241_ALERT_2_C | High 'MainMol' Ueq as Compared to Neighbors of  | O8                          | Check |        |
| PLAT241_ALERT_2_C | High 'MainMol' Ueq as Compared to Neighbors of  | C75                         | Check |        |
| PLAT242_ALERT_2_C | Low 'MainMol' Ueq as Compared to Neighbors of   | C24                         | Check |        |
| PLAT242_ALERT_2_C | Low 'MainMol' Ueq as Compared to Neighbors of   | C42                         | Check |        |
| PLAT242_ALERT_2_C | Low 'MainMol' Ueq as Compared to Neighbors of   | C51                         | Check |        |
| PLAT242_ALERT_2_C | Low 'MainMol' Ueq as Compared to Neighbors of   | C69                         | Check |        |
| PLAT242_ALERT_2_C | Low 'MainMol' Ueq as Compared to Neighbors of   | C96                         | Check |        |
| PLAT242_ALERT_2_C | Low 'MainMol' Ueq as Compared to Neighbors of   | C114                        | Check |        |
| PLAT242_ALERT_2_C | Low 'MainMol' Ueq as Compared to Neighbors of   | C123                        | Check |        |
| PLAT342_ALERT_3_C | Low Bond Precision on C-C Bonds .....           | 0.00986                     | Ang.  |        |
| PLAT790_ALERT_4_C | Centre of Gravity not Within Unit Cell: Resd. # | 1                           | Note  |        |
|                   | C81 H108 Li N9 O9 Pb Sn3                        |                             |       |        |

---

### ● Alert level G

|                   |                                                  |       |             |  |
|-------------------|--------------------------------------------------|-------|-------------|--|
| PLAT002_ALERT_2_G | Number of Distance or Angle Restraints on AtSite | 7     | Note        |  |
| PLAT003_ALERT_2_G | Number of Uiso or Uij Restrained non-H Atoms ... | 32    | Report      |  |
| PLAT005_ALERT_5_G | No Embedded Refinement Details found in the CIF  |       | Please Do ! |  |
| PLAT083_ALERT_2_G | SHELXL Second Parameter in WGHT Unusually Large  | 14.56 | Why ?       |  |
| PLAT301_ALERT_3_G | Main Residue Disorder ..... Percentage =         | 1     | Note        |  |
| PLAT779_ALERT_4_G | Suspect or Irrelevant (Bond) Angle in CIF .... # | 142   | Check       |  |
|                   | C35F -C33 -C35 1.555 1.555 1.555                 | 12.70 | Deg.        |  |
| PLAT860_ALERT_3_G | Number of Least-Squares Restraints .....         | 166   | Note        |  |

---

0 **ALERT level A** = Most likely a serious problem - resolve or explain  
0 **ALERT level B** = A potentially serious problem, consider carefully  
17 **ALERT level C** = Check. Ensure it is not caused by an omission or oversight  
7 **ALERT level G** = General information/check it is not something unexpected

0 **ALERT type 1** CIF construction/syntax error, inconsistent or missing data  
15 **ALERT type 2** Indicator that the structure model may be wrong or deficient  
5 **ALERT type 3** Indicator that the structure quality may be low  
3 **ALERT type 4** Improvement, methodology, query or suggestion  
1 **ALERT type 5** Informative message, check

---

It is advisable to attempt to resolve as many as possible of the alerts in all categories. Often the minor alerts point to easily fixed oversights, errors and omissions in your CIF or refinement strategy, so attention to these fine details can be worthwhile. In order to resolve some of the more serious problems it may be necessary to carry out additional measurements or structure refinements. However, the purpose of your study may justify the reported deviations and the more serious of these should normally be commented upon in the discussion or experimental section of a paper or in the "special\_details" fields of the CIF. checkCIF was carefully designed to identify outliers and unusual parameters, but every test has its limitations and alerts that are not important in a particular case may appear. Conversely, the absence of alerts does not guarantee there are no aspects of the results needing attention. It is up to the individual to critically assess their own results and, if necessary, seek expert advice.

### **Publication of your CIF in IUCr journals**

A basic structural check has been run on your CIF. These basic checks will be run on all CIFs submitted for publication in IUCr journals (*Acta Crystallographica*, *Journal of Applied Crystallography*, *Journal of Synchrotron Radiation*); however, if you intend to submit to *Acta Crystallographica Section C* or *E* or *IUCrData*, you should make sure that full publication checks are run on the final version of your CIF prior to submission.

### **Publication of your CIF in other journals**

Please refer to the *Notes for Authors* of the relevant journal for any special instructions relating to CIF submission.

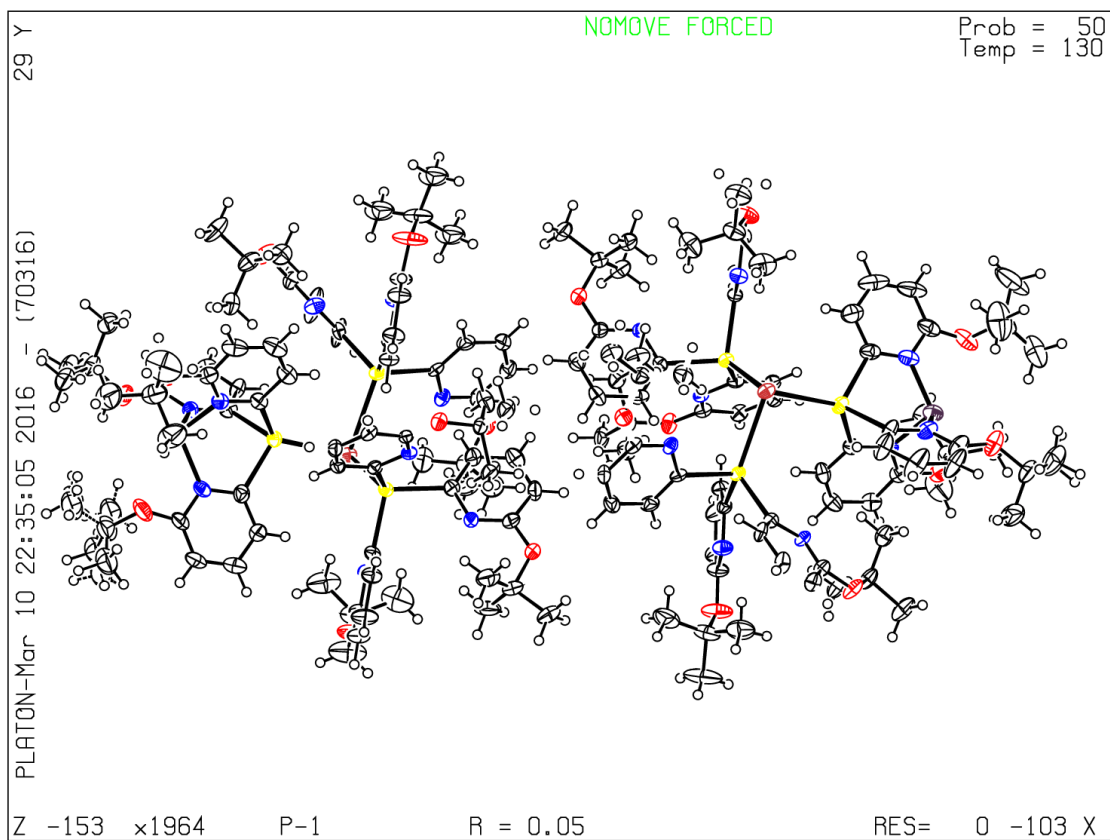



# checkCIF/PLATON report

You have not supplied any structure factors. As a result the full set of tests cannot be run.

THIS REPORT IS FOR GUIDANCE ONLY. IF USED AS PART OF A REVIEW PROCEDURE FOR PUBLICATION, IT SHOULD NOT REPLACE THE EXPERTISE OF AN EXPERIENCED CRYSTALLOGRAPHIC REFEREE.

No syntax errors found.      CIF dictionary      Interpreting this report

## Datablock: x2008

---

|                 |                             |                             |             |
|-----------------|-----------------------------|-----------------------------|-------------|
| Bond precision: | C-C = 0.0046 A              | Wavelength=0.71073          |             |
| Cell:           | a=14.4547(3)                | b=14.4547(3)                | c=8.7666(3) |
|                 | alpha=90                    | beta=90                     | gamma=120   |
| Temperature:    | 130 K                       |                             |             |
|                 | Calculated                  | Reported                    |             |
| Volume          | 1586.28(10)                 | 1586.28(7)                  |             |
| Space group     | P -3                        | P-3                         |             |
| Hall group      | -P 3                        | ?                           |             |
| Moiety formula  | C54 H72 N6 O6 Sn2, 2(C6 H6) | C54 H72 N6 O6 Sn2, 2(C6 H6) |             |
| Sum formula     | C66 H84 N6 O6 Sn2           | C66 H84 N6 O6 Sn2           |             |
| Mr              | 1294.81                     | 1294.77                     |             |
| Dx,g cm-3       | 1.355                       | 1.355                       |             |
| Z               | 1                           | 1                           |             |
| Mu (mm-1)       | 0.841                       | 0.841                       |             |
| F000            | 670.0                       | 670.0                       |             |
| F000'           | 668.92                      |                             |             |
| h,k,lmax        | 18,18,10                    | 18,14,10                    |             |
| Nref            | 2162                        | 2160                        |             |
| Tmin,Tmax       | 0.904,0.992                 | 0.978,1.000                 |             |
| Tmin'           | 0.810                       |                             |             |

Correction method= # Reported T Limits: Tmin=0.978 Tmax=1.000  
AbsCorr = MULTI-SCAN

Data completeness= 0.999      Theta(max)= 26.350

R(reflections)= 0.0321( 1868)      wR2(reflections)= 0.0621( 2160)

S = 1.056      Npar= 124

---

The following ALERTS were generated. Each ALERT has the format

**test-name\_ALERT\_alert-type\_alert-level.**

Click on the hyperlinks for more details of the test.

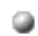

### Alert level G

|                   |                                                  |             |
|-------------------|--------------------------------------------------|-------------|
| PLAT005_ALERT_5_G | No Embedded Refinement Details found in the CIF  | Please Do ! |
| PLAT152_ALERT_1_G | The Supplied and Calc. Volume s.u. Differ by ... | 3 Units     |
| PLAT951_ALERT_5_G | Calculated (ThMax) and CIF-Reported Kmax Differ  | 4 Units     |

---

0 **ALERT level A** = Most likely a serious problem - resolve or explain  
0 **ALERT level B** = A potentially serious problem, consider carefully  
0 **ALERT level C** = Check. Ensure it is not caused by an omission or oversight  
3 **ALERT level G** = General information/check it is not something unexpected

1 ALERT type 1 CIF construction/syntax error, inconsistent or missing data  
0 ALERT type 2 Indicator that the structure model may be wrong or deficient  
0 ALERT type 3 Indicator that the structure quality may be low  
0 ALERT type 4 Improvement, methodology, query or suggestion  
2 ALERT type 5 Informative message, check

---

It is advisable to attempt to resolve as many as possible of the alerts in all categories. Often the minor alerts point to easily fixed oversights, errors and omissions in your CIF or refinement strategy, so attention to these fine details can be worthwhile. In order to resolve some of the more serious problems it may be necessary to carry out additional measurements or structure refinements. However, the purpose of your study may justify the reported deviations and the more serious of these should normally be commented upon in the discussion or experimental section of a paper or in the "special\_details" fields of the CIF. checkCIF was carefully designed to identify outliers and unusual parameters, but every test has its limitations and alerts that are not important in a particular case may appear. Conversely, the absence of alerts does not guarantee there are no aspects of the results needing attention. It is up to the individual to critically assess their own results and, if necessary, seek expert advice.

### Publication of your CIF in IUCr journals

A basic structural check has been run on your CIF. These basic checks will be run on all CIFs submitted for publication in IUCr journals (*Acta Crystallographica*, *Journal of Applied Crystallography*, *Journal of Synchrotron Radiation*); however, if you intend to submit to *Acta Crystallographica Section C* or *E* or *IUCrData*, you should make sure that full publication checks are run on the final version of your CIF prior to submission.

### Publication of your CIF in other journals

Please refer to the *Notes for Authors* of the relevant journal for any special instructions relating to CIF submission.

---

**PLATON version of 07/03/2016; check.def file version of 02/03/2016**

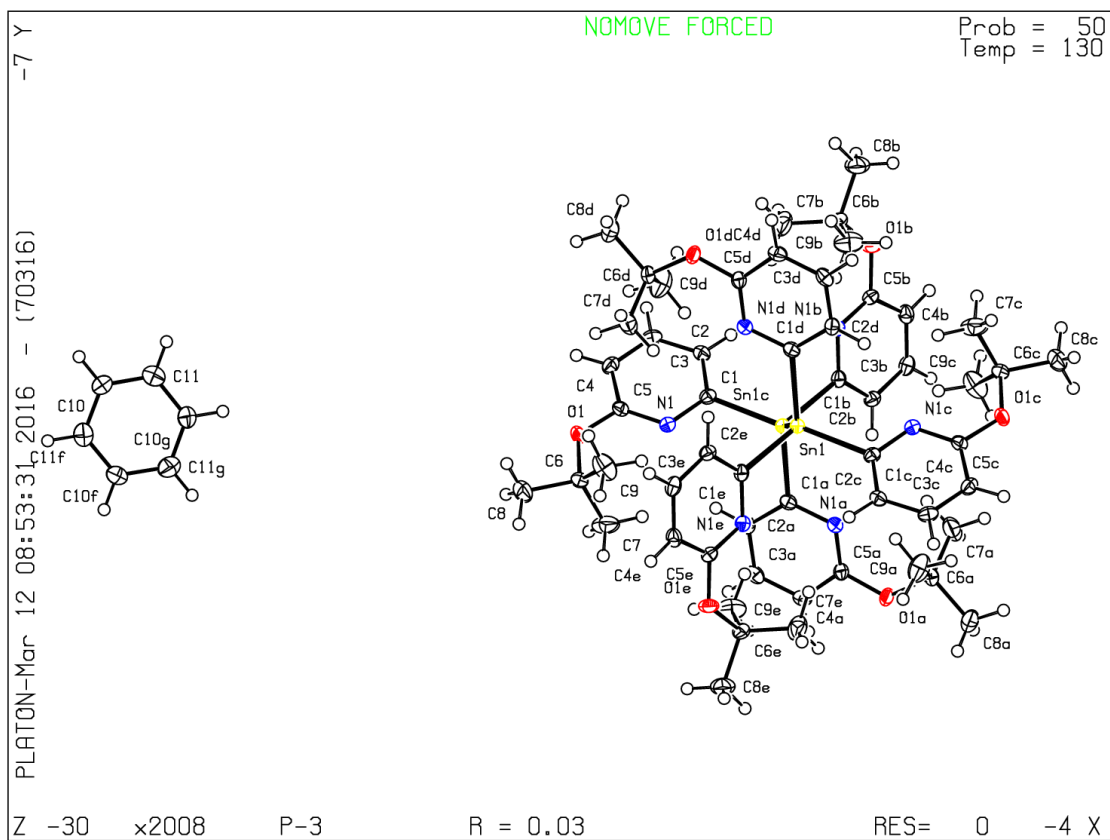

Supplement: s1 [file s1]
