# Supplementary material
Source: MDPI journal article supplement (https://www.mdpi.com/2304-6740/4/2/19)
Supplement: s1 [file s1]

# Supplementary Materials: Monoanionic Tin Oligomers Featuring Sn–Sn or Sn–Pb Bonds: Synthesis and Characterization of a Tris(Triheteroarylstannyl)Stannate and -Plumbate

Kornelia Zeckert

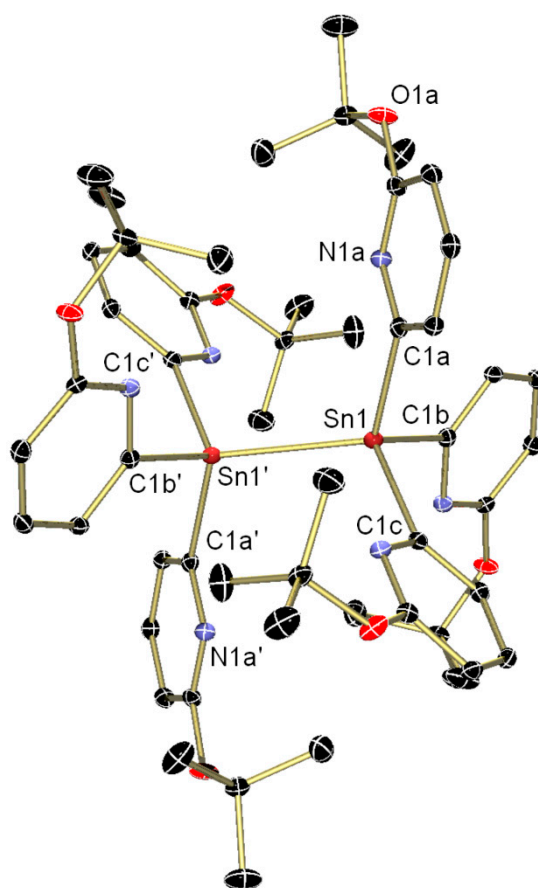

**Figure S1.** Molecular structure of  $[\text{Sn}(\text{2-py}^{6\text{OtBu}})_3]_2$  (**4**) with 30% probability ellipsoids. Hydrogen atoms are omitted for clarity. Selected bond lengths (Å) and angles (°): Sn1–Sn1' 2.7631(6), Sn–C1a 2.154(2), C1a–Sn–C1b 106.65(7), C1a–Sn–Sn1' 112.16(6); equivalent atoms are generated by b:  $-y+1, x-y-1, z$ ; c:  $-x+y+2, -x+1, z$ ; ' :  $-x+2, -y, -z+1$ .

**Table S1.** Crystallographic data for compound **4**.

| <b>4 · 2 C<sub>6</sub>H<sub>6</sub></b>                           |                                                                  |
|-------------------------------------------------------------------|------------------------------------------------------------------|
| Formula                                                           | C <sub>66</sub> H <sub>84</sub> N <sub>6</sub> O <sub>6</sub> Sn |
| M <sub>r</sub> (g·mol <sup>-1</sup> )                             | 1294.77                                                          |
| Cryst system                                                      | trigonal                                                         |
| Space group                                                       | $P\bar{3}$                                                       |
| <i>a</i> (Å)                                                      | 14.4547(3)                                                       |
| <i>b</i> (Å)                                                      | 14.4547(3)                                                       |
| <i>c</i> (Å)                                                      | 8.7666(3)                                                        |
| α (°)                                                             | 90.0                                                             |
| β (°)                                                             | 90.0                                                             |
| γ (°)                                                             | 120.0                                                            |
| <i>V</i> (Å <sup>3</sup> )                                        | 1586.28(7)                                                       |
| <i>Z</i>                                                          | 1                                                                |
| F(000)                                                            | 670                                                              |
| <i>T</i> (K)                                                      | −130(2)                                                          |
| Q <sub>calcd</sub> (g·cm <sup>3</sup> )                           | 1.355                                                            |
| <i>M</i> (mm <sup>-1</sup> )                                      | 0.841                                                            |
| Reflns collected                                                  | 3618                                                             |
| Reflns unique                                                     | 2160                                                             |
| <i>R</i> <sub>int</sub>                                           | 0.0257                                                           |
| Final <i>R</i> <sub>1</sub> ( <i>I</i> > 2σ( <i>I</i> ))          | 0.0321                                                           |
| Final <i>wR</i> <sub>2</sub> ( <i>F</i> <sup>2</sup> ) (all data) | 0.0621                                                           |

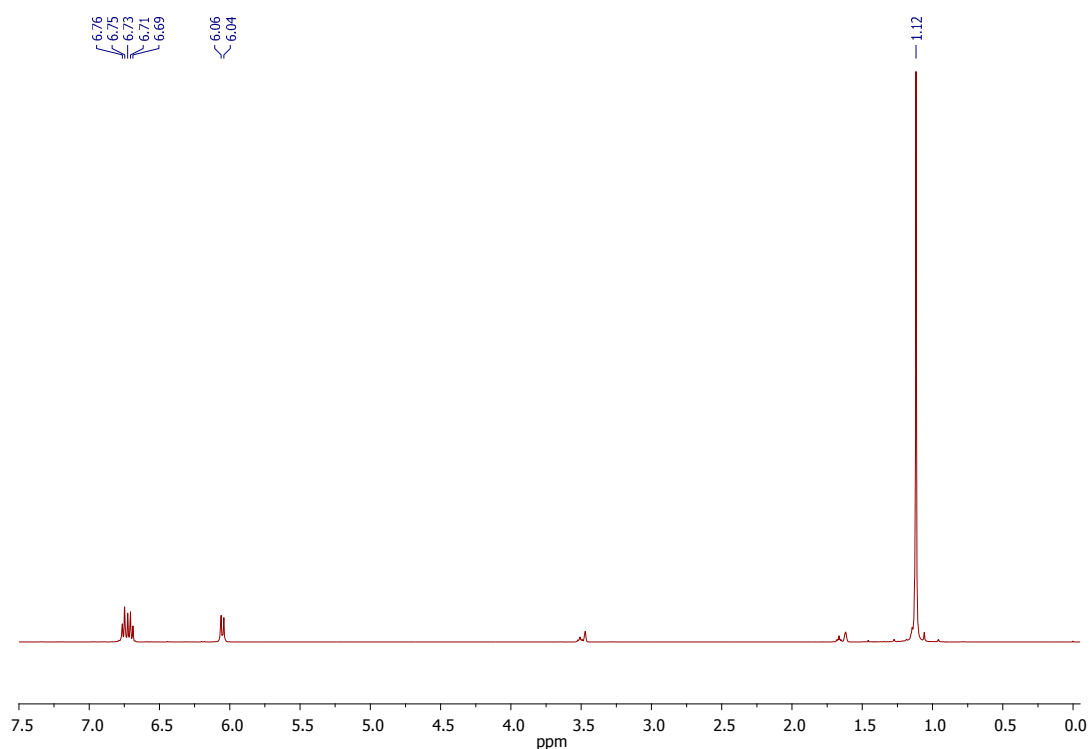**Figure S2.** <sup>1</sup>H NMR spectrum of [LiSn{Sn(2-py<sup>6</sup>O<sup>t</sup>Bu)<sub>3</sub>}<sub>3</sub>] (**2**) in *d*<sub>8</sub>-THF.

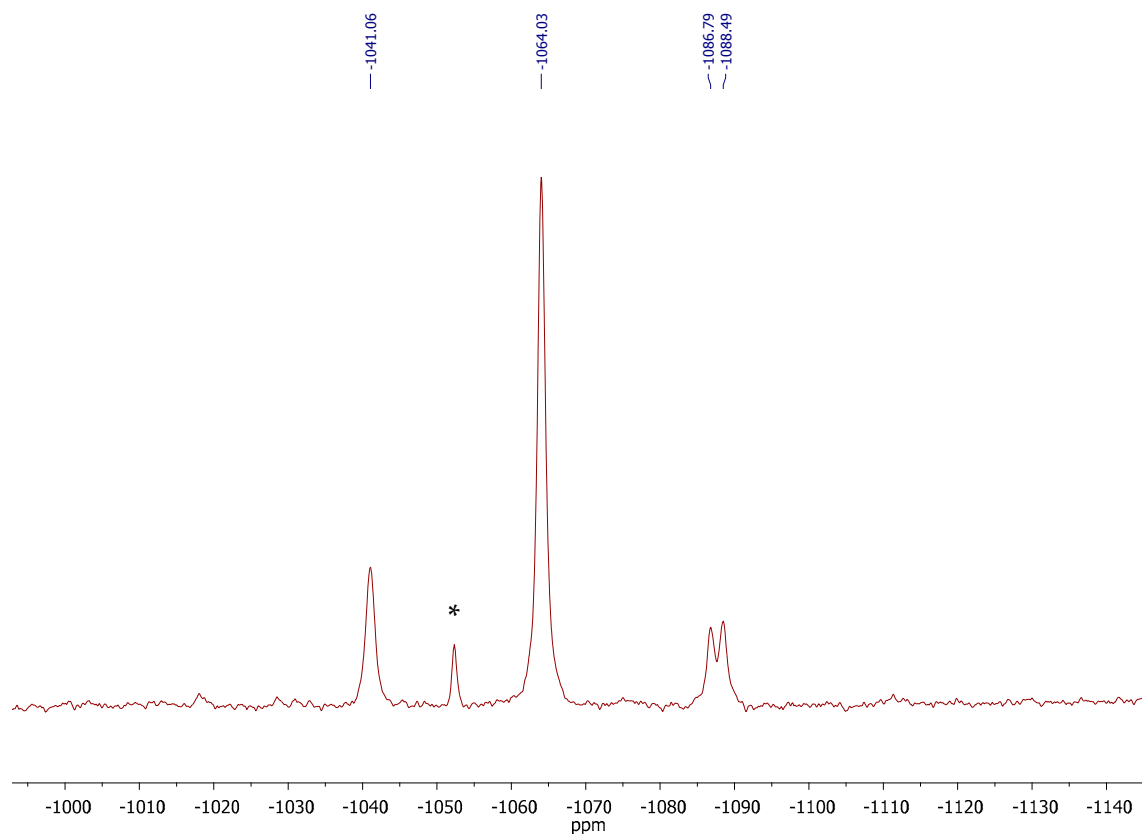

**Figure S3.**  $^{119}\text{Sn}\{^1\text{H}\}$  NMR spectrum of  $[\text{LiSn}\{\text{Sn}(\text{2-py}^{\text{6OtBu}})_3\}_3]$  (**2**) in  $d_8$ -THF with the  $^{119}\text{Sn}$  NMR resonance at  $-1064$  ppm; \* impurity.

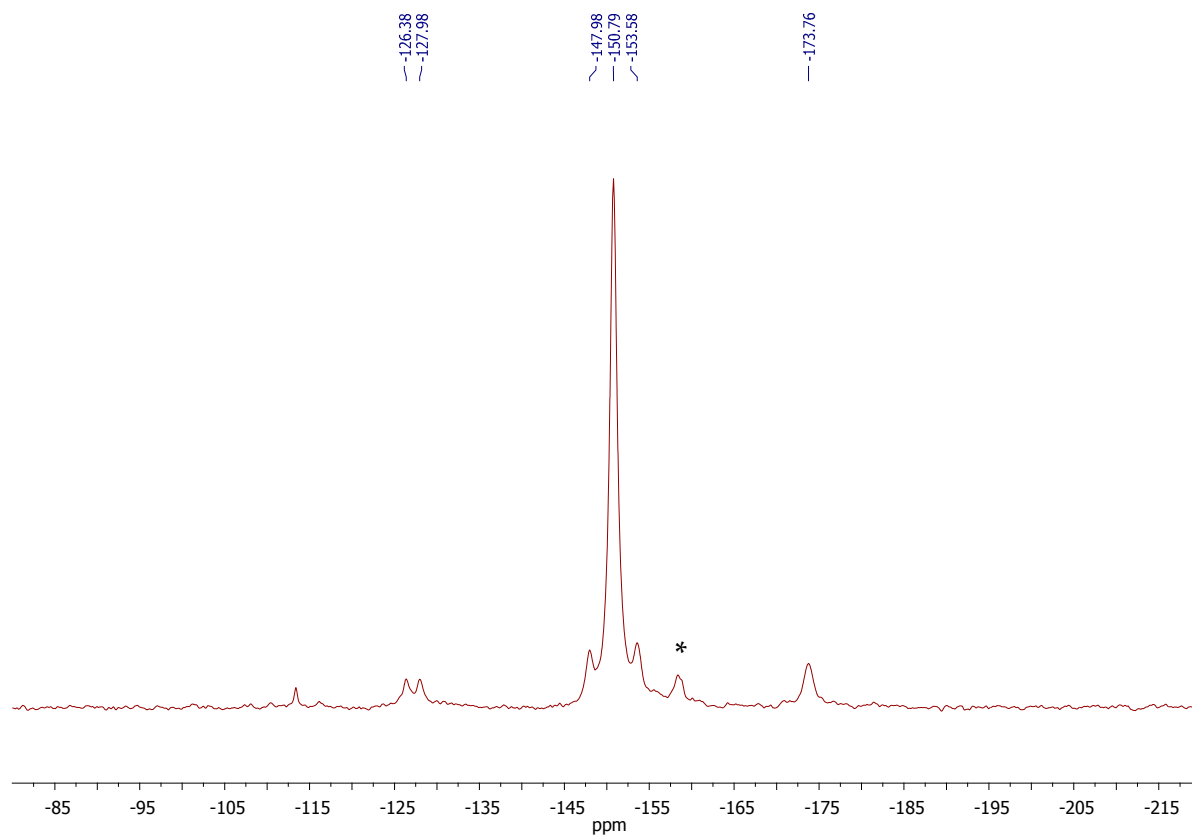

**Figure S4.**  $^{119}\text{Sn}\{^1\text{H}\}$  NMR spectrum of  $[\text{LiSn}\{\text{Sn}(\text{2-py}^{\text{6OtBu}})_3\}_3]$  (**2**) in  $d_8$ -THF with the  $^{119}\text{Sn}$  NMR resonance at  $-151$  ppm; \* impurity.

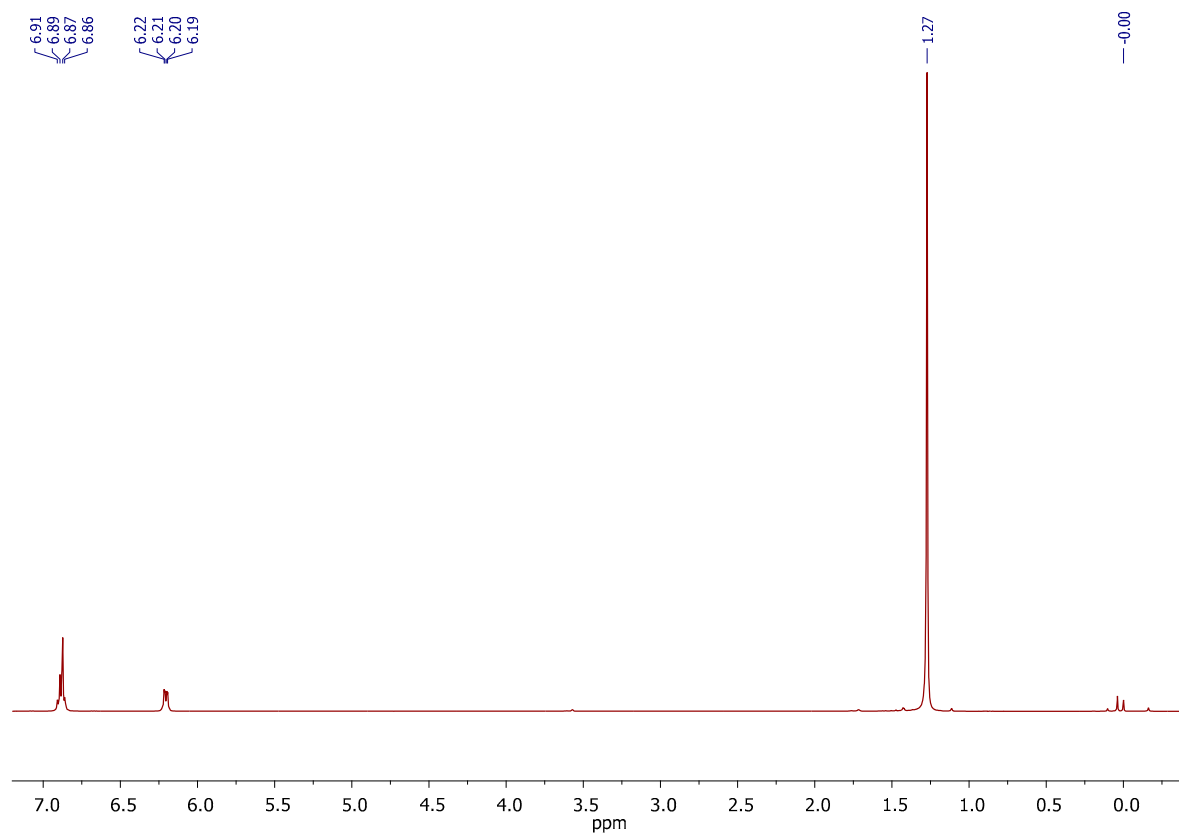

Figure S5.  $^1\text{H}$  NMR spectrum of  $[\text{LiPb}\{\text{Sn}(\text{2-py}^{6\text{OtBu}})_3\}_3]$  (3) in  $d_8$ -THF.

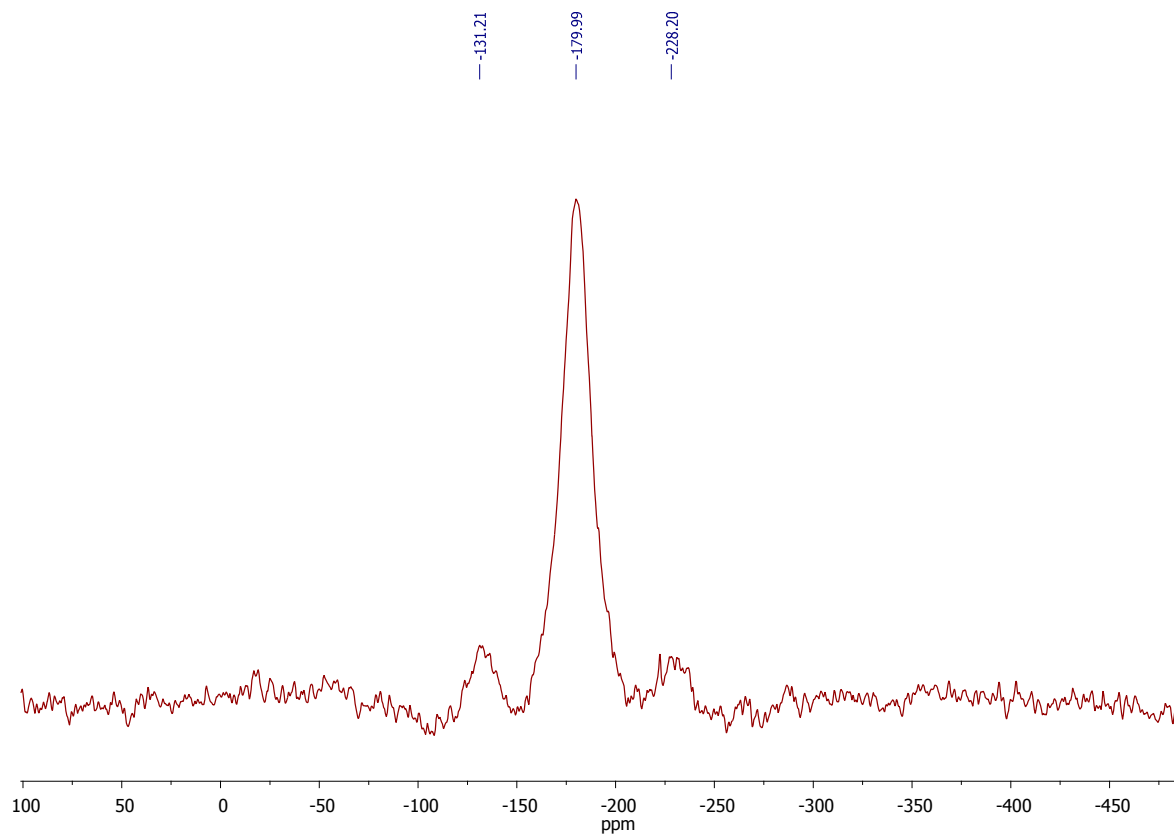

Figure S6.  $^{119}\text{Sn}\{^1\text{H}\}$  NMR spectrum of  $[\text{LiPb}\{\text{Sn}(\text{2-py}^{6\text{OtBu}})_3\}_3]$  (3) in  $d_8$ -THF.

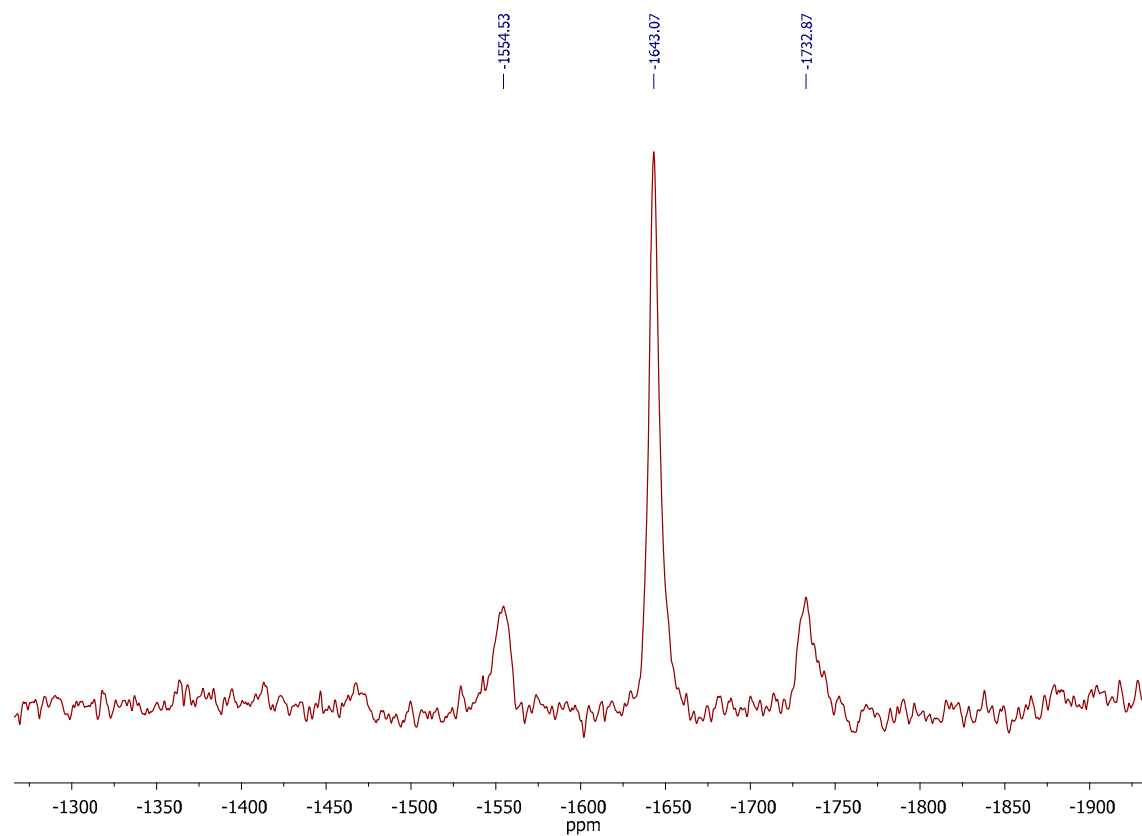

**Figure S7.**  $^{207}\text{Pb}\{^1\text{H}\}$  NMR spectrum of  $[\text{LiPb}\{\text{Sn}(\text{2-py}^{6\text{OtBu}})_3\}_3]$  (**3**) in  $d_8$ -THF.
